# Supplementary material
Source: Springer Nature journal article supplement (https://www.springermedizin.de/resource/supplementary/12955_2010_761_MOESM1_ESM.pdf/9560936)
Supplement: MOESM1 [file 9560936]

b 2 Sensory functions  
and pain (1<sup>st</sup> level)

b 280 Sensation of pain  
(2<sup>nd</sup> level)

b 2801 Pain in body  
part (3rd level)

b 28016 Pain in joints  
(4th level)
